# Supplementary material for: Perch, Perca fluviatilis show a directional preference for, but do not increase attacks toward, prey in response to water-borne cortisol
Source: PeerJ. 2017 Oct 3;5:e3883. doi: 10.7717/peerj.3883 (PMC5629957; doi:10.7717/peerj.3883)
Supplement: Data S1 [file peerj-05-3883-s001.xlsx]

## Sheet: PropDuration
ID	Treatment	Prop_dur
P1	Control	0.31
P10	Control	0.19
P11	Control	0.36
P12	Control	0.14
P13	Control	0.03
P14	Control	0.38
P15	Control	0.11
P17	Control	0.27
P18	Control	0.47
P2	Control	0.42
P4	Control	0.47
P5	Control	0.69
P6	Control	0.24
P7	Control	0.54
P8	Control	0.37
P9	Control	0.32
P10	Cortisol	0.7
P11	Cortisol	0.75
P12	Cortisol	0.37
P13	Cortisol	0.09
P14	Cortisol	0.7
P17	Cortisol	0.35
P3	Cortisol	0.84
P4	Cortisol	0.87
P6	Cortisol	0.55
P8	Cortisol	0.76
P9	Cortisol	0.59
P1	Stickleback	0.48
P10	Stickleback	0.34
P11	Stickleback	0.06
P13	Stickleback	0.07
P14	Stickleback	0.38
P15	Stickleback	0.35
P16	Stickleback	0.48
P17	Stickleback	0.75
P2	Stickleback	0.47
P3	Stickleback	0.36
P4	Stickleback	0.76
P5	Stickleback	0
P6	Stickleback	0.26
P8	Stickleback	0.84
P9	Stickleback	0.19

## Sheet: PropOrient
ID	Trial	Prop_orient
P1	Control	0.39
P10	Control	0.39
P11	Control	0.83
P12	Control	0
P13	Control	0.39
P14	Control	0.68
P15	Control	0.06
P17	Control	0.1
P18	Control	0.07
P2	Control	0.94
P4	Control	0.06
P5	Control	1
P6	Control	0.38
P7	Control	0.02
P8	Control	0.05
P9	Control	0.54
P10	Cortisol	0.94
P11	Cortisol	0.93
P12	Cortisol	0.81
P13	Cortisol	0.74
P14	Cortisol	0.94
P17	Cortisol	0.55
P3	Cortisol	0.96
P4	Cortisol	0.96
P6	Cortisol	0.83
P8	Cortisol	0.83
P9	Cortisol	0.92
P1	Stickleback	0.62
P10	Stickleback	0.67
P11	Stickleback	0.02
P13	Stickleback	0.03
P14	Stickleback	0.77
P15	Stickleback	0.34
P16	Stickleback	0.5
P17	Stickleback	0.96
P2	Stickleback	0.21
P3	Stickleback	0.8
P4	Stickleback	0.94
P5	Stickleback	0
P6	Stickleback	0.53
P8	Stickleback	0.82
P9	Stickleback	0.77

## Sheet: PropLunge
ID	Treatment	PropLun
P1	Control	0.0125
P10	Control	0.110236
P11	Control	0.424324
P12	Control	NA
P13	Control	0
P14	Control	0.318182
P15	Control	1
P17	Control	0.5
P18	Control	0.453125
P2	Control	NA
P4	Control	0.156069
P5	Control	1
P6	Control	0.488372
P7	Control	0.0202429
P8	Control	0.4
P9	Control	0.0555556
P10	Cortisol	0.940984
P11	Cortisol	0.859504
P12	Cortisol	0.421053
P13	Cortisol	0.104308
P14	Cortisol	0.746269
P17	Cortisol	0.333333
P3	Cortisol	NA
P4	Cortisol	0.992248
P6	Cortisol	0.192982
P8	Cortisol	NA
P9	Cortisol	0.47619
P1	Stickleback	0
P10	Stickleback	0.494624
P11	Stickleback	NA
P13	Stickleback	0.222222
P14	Stickleback	0.141304
P15	Stickleback	1
P16	Stickleback	0.625
P17	Stickleback	0.888889
P2	Stickleback	0.564706
P3	Stickleback	0.188679
P4	Stickleback	0.967213
P5	Stickleback	NA
P6	Stickleback	0.166667
P8	Stickleback	0
P9	Stickleback	0.0569106

## Sheet: PerchMovements
ID	Treatment	Movements	ActiveMove
P1	Control	103	1
P10	Control	82	1
P11	Control	185	1
P12	Control	7	1
P13	Control	25	1
P14	Control	176	1
P15	Control	42	1
P16	Control	NA	0
P17	Control	51	1
P18	Control	91	1
P2	Control	37	1
P3	Control	NA	0
P4	Control	78	1
P5	Control	8	1
P6	Control	82	1
P7	Control	103	1
P8	Control	108	1
P9	Control	26	1
P1	Cortisol	NA	0
P10	Cortisol	92	1
P11	Cortisol	78	1
P12	Cortisol	60	1
P13	Cortisol	91	1
P14	Cortisol	107	1
P15	Cortisol	NA	0
P16	Cortisol	NA	0
P17	Cortisol	51	1
P18	Cortisol	NA	0
P2	Cortisol	NA	0
P3	Cortisol	39	1
P4	Cortisol	54	1
P5	Cortisol	NA	0
P6	Cortisol	137	1
P7	Cortisol	NA	0
P8	Cortisol	32	1
P9	Cortisol	91	1
P1	Stickleback	106	1
P10	Stickleback	115	1
P11	Stickleback	23	1
P12	Stickleback	NA	0
P13	Stickleback	39	1
P14	Stickleback	153	1
P15	Stickleback	6	1
P16	Stickleback	135	1
P17	Stickleback	60	1
P18	Stickleback	NA	0
P2	Stickleback	236	1
P3	Stickleback	170	1
P4	Stickleback	51	1
P5	Stickleback	4	1
P6	Stickleback	36	1
P7	Stickleback	NA	0
P8	Stickleback	30	1
P9	Stickleback	84	1

## Sheet: Total lunges
ID	Treatment	TotalLunge	TotalLungeStimZone
P6	Cortisol	57	11
P9	Cortisol	21	10
P10	Cortisol	305	287
P11	Cortisol	121	104
P13	Cortisol	441	46
P14	Cortisol	67	50
P17	Cortisol	6	2
P4	Cortisol	129	128
P12	Cortisol	19	8
P8	Cortisol	0	0
P3	Cortisol	0	0
P1	Control	80	1
P5	Control	3	3
P6	Control	43	21
P9	Control	18	1
P10	Control	254	28
P11	Control	370	157
P13	Control	1	0
P14	Control	66	21
P15	Control	23	23
P17	Control	6	3
P4	Control	173	27
P7	Control	247	5
P8	Control	10	4
P18	Control	64	29
P12	Control	0	0
P2	Control	0	0
P1	Stickleback	69	36
P2	Stickleback	85	48
P6	Stickleback	6	1
P9	Stickleback	123	7
P10	Stickleback	186	92
P13	Stickleback	9	2
P14	Stickleback	184	26
P15	Stickleback	2	2
P17	Stickleback	45	40
P3	Stickleback	53	10
P4	Stickleback	183	177
P8	Stickleback	0	0
P16	Stickleback	8	5
P5	Stickleback	0	0
P11	Stickleback	0	0
